# Supplementary figures and images for: Breast Tumor Cells Highly Resistant to Drugs Are Controlled Only by the Immune Response Induced in an Immunocompetent Mouse Model
Source: PubMed Central journal article supplement — Integr Cancer Ther. 2019 May 5;18:1534735419848047. doi: 10.1177/1534735419848047 (PMC6505237; doi:10.1177/1534735419848047), 2019-05-05

**A**

Non-vaccinated mice

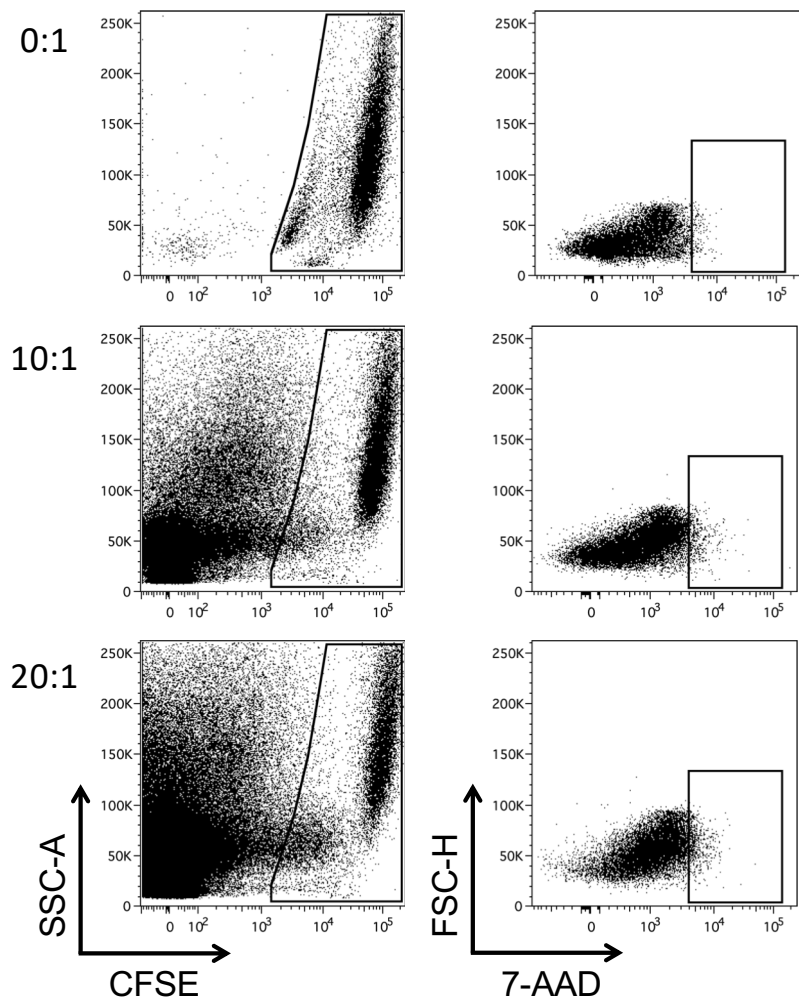**B**

Vaccinated mice

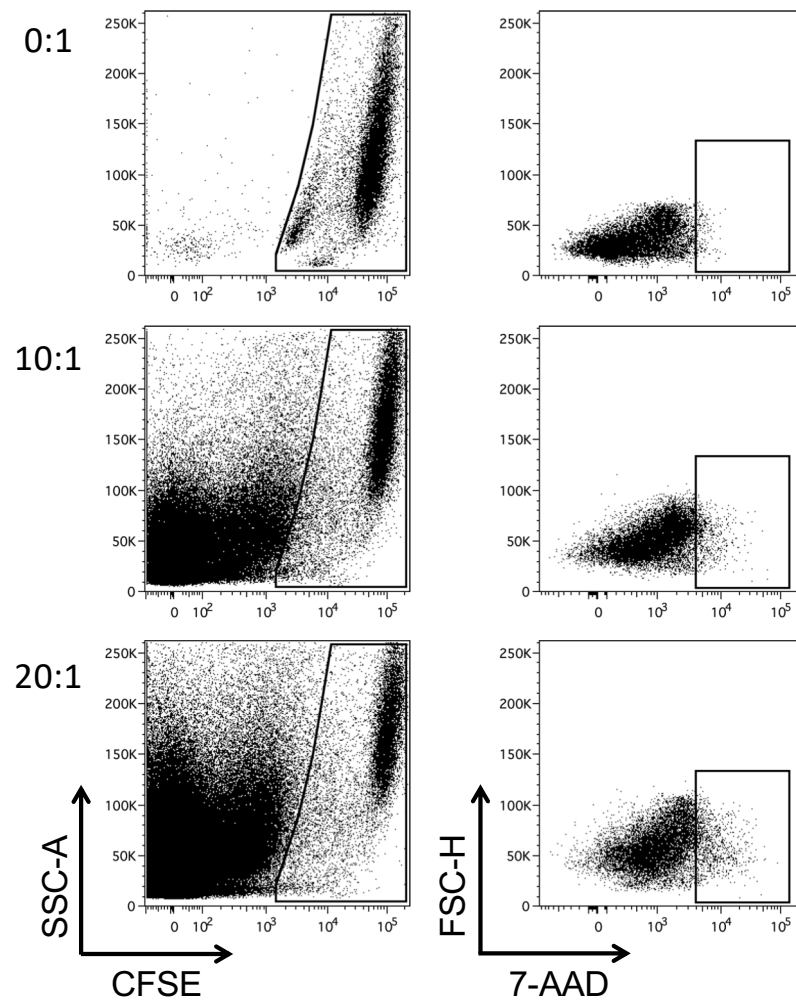

Supplement: Supplementary_figure_1.pdf [file Supplementary_figure_1.pdf]
